# Supplementary material for: A human lectin array for characterizing host-pathogen interactions
Source: PubMed Central journal article supplement (PMC11566865; doi:10.1016/j.jbc.2024.107869), 2024-10-09
Supplement: mmc1.pdf [file mmc1.pdf]

## Supporting Information

### **A human lectin array for characterizing host-pathogen interactions**

Stefi V. Benjamin, Sabine A. F. Jégouzo, Chloe Lieng, Connor Daniels, Marine Coispeau, Rikin J. Lau, Suyeon Kim, Yasmine Metaxa, James Philpott, Tiannuo Li, Chao Dai, Xin Wang, Maddy L. Newby, Gerald B. Pier, Max Crispin, Abigail Clements, Maureen E. Taylor, and Kurt Drickamer

**Figures S1-S33.** Sequences of cDNAs for biotin-tagged CRDs [This file].

**Figure S34.** Saturation curves for coating of assay wells [This file].

**Tables S1-S5.** Binding data for Figures 2-6 [Excel file].

## Sequences of cDNAs for biotin-tagged CRDs

Sequences of cloned CRDs are shown in black. Appended initiation sequences, biotin tags, and variations in the sequences compared to the genomic sequence in the National Center for Biotechnology Information database are indicated in red.

### Figure S1. Mannose-binding protein / lectin (MBP)

MetAl aVal GI yAsnLysPhe  
ggatccgatcttggaggatgattaaatggccgttgggaacaagttc  
PheLeuThrAsnGI yGI uI eMetThrPheGI uLysVal LysAl aLeuCysVal LysPhe  
ttctgaccaatggtgaaataatgacctttgaaaaagtgaaggccttgtgtgtcaagttc  
GI nAl aSerVal Al aThrProArgAsnAl aAl aGI uAsnGI yAl aI eGI nAsnLeuI e  
caggcctctgtggccacccccaggaatgctgagagaatggagccattcagaatctcatc  
LysGI uGI uAl aPheLeuGI yI eThrAspGI uLysThrGI uGI yGI nPheVal AspLeu  
aaggaggaagccttctgggcatcactgatgagaagacagaagggcagtttgtggatctg  
ThrGI yAsnArgLeuThrTyrThrAsnTrpAsnGI uGI yGI uProAsnAsnAl aGI ySer  
acaggaaatagactgacctacacaaactggaacgaggggtgaaccaacaatgctggttct  
AspGI uAspCysVal LeuLeuLeuLysAsnGI yGI nTrpAsnAspVal ProCysSerThr  
gatgaagattgtgtattgctactgaaaaatggccagtggaatgacgtcccctgctccacc  
SerHi sLeuAl aVal CysGI uPheProI eLeuAsnAspI ePheGI uAl aGI nLysI e  
tcccatctggccgtctgtgagttccctatcctgaatgacatcttcaagcacagaaaatc  
GI uTrpHi sGI u\*\*\*  
gagtggcatgagtagaattc

### Figure S2. Surfactant protein A (SP-A)

\*\*\*MetAl aLeuAsnAspI ePheGI uAl aGI nLysI eGI uTrpHi sGI uGI ySer  
taaattggccctgaatgacatcttcaagcacagaaaatcgagtgccatgagggatcc  
Al aHi sLeuAspGI uGI uLeuGI nAl aThrLeuHi sAspPheArgHi sGI nI eLeuGI n  
gctcatctagatgaggagctccaagccacactccacgactttagacatcaaatcctgag  
ThrArgGI yAl aLeuSerLeuGI nGI ySerI eMetThrVal GI yGI uLysVal PheSer  
acaaggggagccctcagctctgcagggctccataatgacagtaggagagaaggtcttctcc  
SerAsnGI yGI nSerI eThrPheAspAl aI eGI nGI uAl aCysAl aArgAl aGI yGI y  
agcaatgggcagttccatcacttttgatgccattcaggaggcatgtgccagagcaggcggc  
ArgI eAl aVal ProArgAsnProGI uGI uAsnGI uAl aI eAl aSerPheVal LysLys  
cgcatgtgttccaaggaatccagagggaaaatgaggccattgcaagcttctgagaag  
TyrAsnThrTyrAl aTyrVal GI yLeuThrGI uGI yProSerProGI yAspPheArgTyr  
tacaacacatatgcctatgtaggcctgactgaggggtcccagcccggagacttccgctac  
SerAspGI yThrProVal AsnTyrThrAsnTrpTyrArgGI yGI uProAl aGI yArgGI y  
tcagacgggaccctgtaaactacaccaactgggtaccgaggggagcccgcaggtcgggga  
LysGI uGI nCysVal GI uMetTyrThrAspGI yGI nTrpAsnAspArgAsnCysLeuTyr  
aaagagcagtggtgtggagatgtacacagatgggcagtggaatgacaggaactgcctgtac  
SerArgLeuThrI eCysGI uPhe\*\*\*  
tcccgactgacctctgtgagttctgaattc

**Figure S3. Surfactant protein D (SP-D)**

MetAl aVal  
ggatccgatcctggaggatgattaaatggccgtc

GI yGI uLysI I ePheLysThrAl aGI yPheVal LysProPheThrGI uAl aGI nLeuLeu  
ggggagaagattttcaagacagcaggctttgtaaaaccatttacggaggcacagctgctg

CysThrGI nAl aGI yGI yGI nLeuAl aSerProArgSerAl aAl aGI uAsnAl aAl aLeu  
tgcacacaggctgggtggacagttggcctctccacgctctgccgctgagaaatgccgccttg

GI nGI nLeuVal Val Al aLysAsnGI uAl aAl aPheLeuSerMetThrAspSerLysThr  
caacagctggctgtagctaagaacgaggctgctttcctgagcatgactgattccaagaca

GI uGI yLysPheThrTyrProThrGI yGI uSerLeuVal TyrSerAsnTrpAl aProGI y  
gagggcaagttcacctacccacaggagagtgccctggctctattccaactgggccccaggg

GI uProAsnAspAspGI yGI ySerGI uAspCysVal GI uI I ePheThrAsnGI yLysTrp  
gagcccaacgatgatggcgggtcagaggactgtgtggagatcttcaccaatggcaagtgg

AsnAspArgAl aCysGI yGI uLysArgLeuVal Val CysGI uPheLeuAsnAspI I ePhe  
aatgacagggcttgtggagaaaagcgtcttgtggtctgagagttcctgaaatgacatcttc

GI uAl aGI nLysI I eGI uTrpHi sGI u\*\*\*  
gaagcacagaaaatcgagtggcatgagtgaattc

**Figure S4. Collectin K1 (ColK1)**

ggatccgatc

MetAl aThrGI uSerLysI I eTyrLeuLeuVal LysGI uGI uLys  
ttggaggatgattaaatggccacggagagcaagatctacctgctggatgaaggaggagaag

ArgTyrAl aAspAl aGI nLeuSerCysGI nGI yArgGI yGI yThrLeuSerMetProLys  
cgctacgaggacgccagctgtcctgccagggccgccccggcagcctgagcatgcccgaag

AspGI uAl aAl aAsnGI yLeuMetAl aAl aTyrLeuAl aGI nAl aGI yLeuAl aArgVal  
gacgaggctgccaatggcctgatggccgcatacctggcgcaagccggcctggcccgtgtc

PheI I eGI yI I eAsnAspLeuGI uLysGI uGI yAl aPheVal TyrSerAspHi sSerPro  
ttcatcggcataacgacctggagaaggagggcgcccttcgtgtactctgaccactcccc

MetArgThrPheAsnLysTrpArgSerGI yGI uProAsnAsnAl aTyrAspGI uGI uAsp  
atgaggaccttcaacaagtggcgcagcgggtgagcccaacaatgcctacgacgaggaggac

CysVal GI uMetVal Al aSerGI yGI yTrpAsnAspVal Al aCysHi sThrThrMetTyr  
tgcgtggagatgggtggcctcgggaggctggaacgacgtggcctgccacaccacatgtac

PheMetCysGI uPheAspLeuAsnAspI I ePheGI uAl aGI nLysI I eGI uTrpHi sGI u  
ttcatgtgtgagtttgacctgaaatgacatcttcgaagcacagaaaatcgagtggcatgag

\*\*\*  
tagaattc

**Figure S5. Langerin (Langerin)**

ggatccgatcttggag  
MetAl aGI nVal Val SerGI nGI yTrpLysTyrPheLysGI yAsnPheTyr  
gatgattaaatggcccaggtgggttctcaaggctggaagtacttcaaggggaacttctat  
TyrPheSerLeuI eProLysThrTrpTyrSerAl aGI uGI nPheCysVal SerArgAsn  
tacttttctctcatttcaaagacctgggtatagtgccgagcagttctgtgtgtccaggaat  
SerHi sLeuThrSerVal ThrSerGI uSerGI uGI nGI uPheLeuTyrLysThrAl aGI y  
tcacacctgacctcggtgacctcagagagcgagcaggagtttctgtataaaacagcgggg  
GI yLeuI eTyrTrpI eGI yLeuThrLysAl aGI yMetGI uGI yAspTrpSerTrpVal  
ggactcatctactggattggactgactaaagcagggatggaaggggactggctctgggtg  
AsnAspThrProPheAsnLysVal GI nSerAl aArgPheTrpI eProGI yGI uProAsn  
aatgacacgccattcaacaagggtccaaagtgcgaggttctggattccaggtgagcccaac  
AspAl aGI yAsnAsnGI uHi sCysGI yAsnI eLysAl aProSerLeuGI nAl aTrpAsn  
gatgctgggaacaatgaacactgtggcaatataaaggctccctcacttcaggcctggaat  
AspAl aProCysAspLysThrPheLeuPheI eCysLysArgProTyrVal ProSerGI u  
gatgccccatgtgacaaaacgtttcttttcttttgtaagcgaccctatgtcccatcagaa  
  
ProGI yLeuAsnAspI ePheGI uAl aGI nLysI eGI uTrpHi sGI u\*\*\*  
ccgggactgaatgacatcttcaagcacagaaaaatcgagtggcatgagtagaagctt

**Figure S6. DC-SIGN / CD209 (DC-SIGN)**

ggatccgatcttggaggatgattaaatggccgaacgcctgtgccaccctgtccctgg  
MetAl aGI uArgLeuCysHi sProCysProTrp  
GI uTrpThrPhePheGI nGI yAsnCysTyrPheMetSerAsnSerGI nArgAsnTrpHi s  
gaatggacattcttccaaggaactgttacttcatgtctaactcccagcgggaactggcac  
AspSerI eTheAl aCysLysGI uVal GI yAl aGI nLeuVal Val I I eLysSerAl aGI u  
gactccatcaccgcctgcaaagaagtgggggccagctcgtcgtaatcaaaagtgtgag  
GI uGI nAsnPheLeuGI nLeuGI nSerSerArgSerAsnArgPheThrTrpMetGI yLeu  
gagcagaacttcttacagctgcagcttccagaagtaaccgcttcacctggatgggactt  
SerAspLeuAsnGI nGI yThrTrpGI nTrpVal AspGI ySerProLeuLeuProSer  
tcagatctaaatcaggaaggcacgtggcaatgggtggacggctcacctctgttgcccagc  
PheLysGI yTyrTrpAsnArgGI yGI uProAsnAsnVal GI yGI uGI uAspCysAl aGI u  
ttcaagcagatttgaacagaggagagcccaacaacgttggggaggaagactgcgcgga  
PheSerGI yAsnGI yTrpAsnGI uGI uLysCysAsnLeuAl aLysPheTrpI eCysLys  
tttagtggcaatggctggaacgacgacaaaatgtaatcttgccaaatctggatctgcaaa  
LysSerAl aAl aSerCysSerArgAspGI uGI uGI nPheLeuSerProAl aProAl aThr  
aagtcgcgacctctctgctccagggatgaagaacagtttctttctccagccccggcacc  
ProAsnProProProAl aGI yLeuAsnAspI ePheGI uAl aGI nLysI eGI uTrpHi s  
ccaaacccccctctgcgggactgaatgacatcttcaagcacagaaaaatcgagtggcat  
  
GI u\*\*\*  
gagtaggaattc

**Figure S7. DC-SIGNR / L-SIGN / CD299 (DC-SIGNR)**

ggatccgatcttggag  
MetAI aGI uArgLeuCysArgHi sCysProLysAspTrpThrPhePheGI n  
gatgattaaatggccgaacgcctgtgccgccactgtccaaggactggacattcttcaa  
GI yAsnCysTyrPheMetSerAsnSerGI nArgAsnTrpHi sAspSerVal ThrAI aCys  
ggaaactgttacttcatgtctaaactcccagcggaaactggcaccgactccgtcaccgcctgc  
GI nGI uVal ArgAI aGI nLeuVal Val I I eLysThrAI aGI uGI uGI nAsnPheLeuGI n  
caggaagtgagggcccagctcgtcgtaatcaaaaactgctgaggagcagaacttctacag  
LeuGI nThrSerArgSerAsnArgPheSerTrpMetGI yLeuSerAspLeuAsnGI nGI u  
ctgcagacttccaggagtaaccgcttctcctggatgggactttcagacctaaatcaggaa  
GI yThrTrpGI nTrpVal AspGI ySerProLeuSerProSerPheGI nArgTyrTrpAsn  
ggcacgtggcaatgggtggacggctcacctctgtcaccagcttccagcggactggaac  
SerGI yGI uProAsnAsnSerGI yAsnGI uAspCysAI aGI uPheSerGI ySerGI yTrp  
agtggagaaccaacaatagcgggaatgaagactgtgcggaatttagtggcagtggctgg  
AsnAspAsnArgCysAspVal AspAsnTyrTrpI I eCysLysLysProAI aAI aCysPhe  
aacgacaatcgatgtgacgttgacaattactggatctgcaaaaagcccgcagcctgcttc  
ArgAspGI uGI yLeuAsnAspI I ePheGI uAI aGI nLysI I eGI uTrpHi sGI u\*\*\*  
agagacgaaggactgaatgacatcttccaagcacagaaaaatcgagtggcatgagttagaa  
ttc

**Figure S8. LSEctin (LSEctin)**

MetAI aAsnSerCysGI uProC  
ggatccgatcttggaggatgattaaatggccaactcctgcgagccgt  
ysProThrSerTrpLeuSerPheGI uGI ySerCysTyrPhePheSerVal ProLysThrT  
gccccacgtcgtggctgtccttcgagggctcctgctactttttctctgtgccaagacga  
hrTrpAI aAI aAI aGI nAspHi sCysAI aAspAI aSerAI aHi sLeuVal I I eVal GI yG  
cgtgggcgggcggcgcaggatcactgcgagatgccagcgcgcacctggtgatcgttgggg  
I yLeuAspGI uGI nGI yPheLeuThrArgAsnThrArgGI yArgGI yTyrTrpLeuGI yL  
gcctggatgagcagggcttccctcactcggaaacacgcgtggccgtggttactggctgggcc  
euArgAI aVal ArgHi sLeuGI yLysVal GI nGI yTyrGI nTrpVal AspGI yVal SerL  
tgagggctgtgcgcatctgggcaagggtcagggctaccagtgggtggacggagtctctc  
euSerPheSerHi sTrpAsnGI nGI yGI uProAsnAspAI aTrpGI yArgGI uAsnCysV  
tcagcttcagccactggaaccagggagagcccaatgacgcttgggggcgcgagaactgtg  
al MetMetLeuHi sThrGI yLeuTrpAsnAspAI aProCysAspSerGI uLysAspGI yT  
tcatgatgctgcacacggggctgtggaacgacgcaccgtgtgacagcgagaaggacggct  
rpl I eCysGI uLysArgHi sAsnCysGI yLeuAsnAspI I ePheGI uAI aGI nLysI I eG  
ggatcgtgtgagaaaaggcacaactgcgagactgaatgacatcttccaagcacagaaaaatcg  
I uTrpHi sGI u\*\*\*  
agtggcatgagtgaatttc

**Figure S9. Endo180 / UPARAP (Endo180 CRD 2)**

aaggatccgatcttggaggatga  
MetAl aVal GI uCysGI uProSerTrpGI nProPheGI nGI yHi sCysTyrArgLe  
ttaaattggccgtggagtgcgagccgagctggcagcccttccagggccactgctaccgcct  
uGI nAl aGI uLysArgSerTrpGI nGI uSerLysLysAl aCysLeuArgGI yGI yGI yAs  
gcaggccgagaagcgcagctggcaggagttccaagaaggcatgtctacggggcggaggcga  
pLeuVal SerI eHi sSerMetAl aGI uLeuGI uPheI eThrLysGI nI eLysGI nGI  
cctggtcagcatccacagcatggcggagctggaattcatcaccaagcagatcaagcaaga  
uVal GI uGI uLeuTrpI eGI yLeuAsnAspLeuLysLeuGI nMetAsnPheGI uTrpSe  
ggaggaggagctgtggatcggcctcaacgatttgaaactgcagatgaattttgagtggtc  
rAspGI ySerLeuVal SerPheThrHi sTrpHi sProPheGI uProAsnAsnPheArgAs  
tgacgggagccttgtgagcttcccccactggcaccctttgagcccaacaacttccggga  
pSerLeuGI uAspCysVal ThrI eTrpGI yProGI uGI yArgTrpAsnAspSerProCy  
cagcttgaggagctgtgtccatctggggcccggaaggccgctggaacgacagtcctg  
sAsnGI nSerLeuProSerI eCysLysLysGI yLeuAsnAspI ePheGI uAl aGI nLys  
taaccagtccttgccatccatctgcaagaaggagctgaatgacatcttcgaagcacagaa  
sI eGI uTrpHi sGI u\*\*\*  
aatcgagtgccatgagtagaagctt

**Figure S10. Dectin-1 (Dectin-1)**

MetGI yVal LeuSerSerProCys  
ggatccgatcttggaggatgattaaatgggggttcttccagccctgt  
ProProAsnTrpI eI eTyrGI uLysSerCysTyrLeuPheSerMetSerLeuAsnSer  
cctcctaattggattatataatgagaagagctgttatctattcagcatgtcactaaattcc  
TrpAspGI ySerLysArgGI nCysTrpGI nLeuGI ySerAsnLeuLeuLysI eAspSer  
tgggatggaagtaaaagacaatgctggcaactgggctctaatctcctaaagatagacagc  
SerAsnGI uLeuGI yPheI eVal LysGI nVal SerSerGI nProAspAsnSerPheTrp  
tcaaatgaattgggatttatagtaaaacaagtgtcttcccaacctgataattcattttgg  
I eGI yLeuSerArgProGI nThrGI uVal ProTrpLeuTrpGI uAspGI ySerThrPhe  
ataggccttctcggccccagactgaggtaccatggctctgggaggatggatcaacattc  
SerSerAsnLeuPheGI nI eArgThrThrAl aThrGI nGI uAsnProSerProAsnCys  
tcttctaacttatttcagatcagaaccacagctaccaagaaaacccatctccaaattgt  
Val TrpI eHi sVal SerVal I eTyrAspGI nLeuCysSerVal ProSerTyrSerI e  
gtatggattcacgtgtcagtcatttatgaccaactgtgtagtgtgccctcatatagatt  
CysGI uLysLysPheSerMetLeuAsnAspI ePheGI uAl aGI nLysI eGI uTrpHi s  
tgtgagaagaagtttcaatgctgaatgacatcttcgaagcacagaaaatcgagtgccat  
GI u\*\*\*  
gagtagaa

**Figure S11. Asialoglycoprotein receptor 1 (ASGPR1)**

MetAl aLeuSerCysGI nMetAl aAl  
ggatccgatccttgaggatgattaaatggccctgagctgtcagatggcggc

aLeuGI nGI yAsnGI ySerGI uArgThrCysCysProVal AsnTrpVal GI uHi sGI uAr  
gctccagggcaatggctcagaaaggacctgctgcccgtcaactgggtggagcagcagcg

gSerCysTyrTrpPheSerArgSerGI yLysAl aTrpAl aAspAl aAspAsnTyrCysAr  
cagctgctactggttctctcgctccgggaaggcctgggctgacgccgacaactactgcc

gLeuGI uAspAl aHi sLeuVal Val Val ThrSerTrpGI uGI uGI nLysPheVal GI nHi  
gctggaggacgcgcacctgggtgggtggtcacgtcctgggaggagcagaaattgtccagca

sHi sI l eGI yProVal AsnThrTrpMetGI yLeuHi sAspGI nAsnGI yProTrpLysTr  
ccacataggccctgtgaacacctggatgggcctccacgaccaaacgggccctggaagt

pVal AspGI yThrAspTyrGI uThrGI yPheLysAsnTrpArgProGI uGI nProAspAs  
ggtggacgggacggactacgagacgggcttcaagaactggaggccggagcagccggacga

pTrpTyrGI yHi sGI yLeuGI yGI yGI yGI uAspCysAl aHi sPheThrAspAspGI yAr  
ctggtacggccacgggctcggaggaggcaggactgtgcccacttcaccgacgacggccg

gTrpAsnAspAspVal CysGI nArgProTyrArgTrpVal CysGI uThrGI uLeuAspLy  
ctggaacgacgacgtctgccagaggccctaccgctgggtctgagagacagagctggacaa

sAl aSerGI nGI uProProLeuLeuGI yLeuAsnAspI l ePheGI uAl aGI nLysI l eGI  
ggccagccaggagccacctctccttggactgaatgacatcttcaagcacagaaaatcga

uTrpHi sGI u\*\*\*  
gtggcatgagtagaattc

**Figure S12. Asialoglycoprotein receptor 2 (ASGPR2)**

MetAl aVal  
ggatccgatccttgaggatgattaaatggccgtg

Al aCysGI nMetGI uLeuLeuHi sSerAsnGI ySerGI nArgThrCysCysProVal Asn  
gcctgccagatggagctcctccacagcaacggctcccaaaggacctgtgccccgtcaac

TrpVal GI uHi sGI nGI ySerCysTyrTrpPheSerHi sSerGI yLysAl aTrpAl aGI u  
tgggtggagcaccaaggcagctgctactggttctctcactccgggaaggcctgggctgag

Al aGI uLysTyrCysGI nLeuGI uAsnAl aHi sLeuVal Val I l eAsnSerTrpGI uGI u  
gcgagaagtactgccagctggagaacgcacacctgggtggatcaactcctgggaggag

GI nLysPheI l eVal GI nHi sThrAsnProPheAsnThrTrpI l eGI yLeuThrAspSer  
cagaaattcattgtacaacacacgaacccttcaatacctggataggctcacggacagt

AspGI ySerTrpLysTrpVal AspGI yThrAspTyrArgHi sAsnTyrLysAsnTrpAl a  
gatggctcttggaaatgggtggatggcacagactataggcacaactacaagaactgggct

Val ThrGI nProAspAsnTrpHi sGI yHi sGI uLeuGI yGI ySerGI uAspCysVal GI u  
gtcactcagccagataattggcacgggcacgagctgggtggaagtgaagactgtgtgaa

Val GI nProAspGI yArgTrpAsnAspAspPheCysLeuGI nVal TyrArgTrpVal Cys  
gtccagccgatggccgctggaacgatgacttctgcctgcaggtgtaccgctgggtgtgt

GI uLysArgArgAsnAl aThrGI yGI uVal Al aGI yLeuAsnAspI l ePheGI uAl aGI n  
gagaaaaggcgaatgccaccggcgagggtggccggactgaatgacatcttcaagcacag

LysI l eGI uTrpHi sGI u\*\*\*  
aaaatcgagtggcatgagtagaattc

**Figure S13. Macrophage galactose receptor (MGL)**

ggatccgatc  
MetAl aLeuThrCysGI nVal AI aThrLeuAsnAsnAsnAI aSer  
ttggaggatgattaaatggccctgacctgccaggtggctactctcaacaacaatgacctc  
ThrGI uGI yThrCysCysProVal AsnTrpVal GI uHi sGI nAspSerCysTyrTrpPhe  
actgaagggacctgctgccccgtcaactgggtggagcaccaagacagctgctactgggtc  
SerHi sSerGI yMetSerTrpAI aGI uAI aGI uLysTyrCysGI nLeuLysAsnAI aHi s  
tctcactctgggatgtctctgggccgaggctgagaagtactgccagctgaagaacgcccac  
LeuVal Val I I eAsnSerArgGI uGI uGI nAsnPheVal GI nLysTyrLeuGI ySerAI a  
ctggtgggtcatcaactccaggaggagcagaat tttgtccagaaatatctaggctccgca  
TyrThrTrpMetGI yLeuSerAspProGI uGI yAI aTrpLysTrpVal AspGI yThrAsp  
tacacctggatgggacctcagtgacctgaaggagcctggaagtgggtggatggaacagac  
TyrAI aThrGI yPheGI nAsnTrpLysProGI yGI nProAspAspTrpGI nGI yHi sGI y  
tatgcgaccggcttccagaactggaagccaggccagccagacgactggcaggggcacggg  
LeuGI yGI yGI yGI uAspCysAI aHi sPheHi sProAspGI yArgTrpAsnAspAspVal  
ctgggtggaggcgaggactgtgctcacttccatccagacggcagggtggaatgacgacgctc  
CysGI nArgProTyrHi sTrpVal CysGI uAI aGI yLeuGI yGI nThrSerGI nGI uSer  
tgccagaggccctaccactgggtctgagaggctggcctgggtcagaccagccaggagagt  
Hi sGI yLeuAsnAspI I ePheGI uAI aGI nLysI I eGI uTrpHi sGI u\*\*\*  
cacggactgaatgacatcttccaagcacagaaaaatcgagtggcatgagtagaatc

**Figure S14. Galectin 1 (Galectin 1)**

MetAl aSerGI yLeuVal AI aSerAsnLeuAsn  
ggatccgatcttggaggatgattaaatggccctcgggtctggtcgccagcaacctgaat  
LeuLysProGI yGI uSerLeuArgVal ArgGI yGI uVal AI aProAspAI aLysSerPhe  
ctcaaacctggagagctctcttcgagtgcgagggcagggtggctcctgacgctaagagcttc  
Val LeuAsnLeuGI yLysAspSerAsnAsnLeuSerLeuHi sPheAsnProArgPheAsn  
gtgctgaacctgggcaaagactctaacaacctgtcactgcacttcaacctcgcttcaac  
AI aHi sGI yAspAI aAsnThrI I eVal SerAsnSerLysAspGI yGI yAI aTrpGI yThr  
gcccacggcgacgccaacaccatcgtgtcttaactccaaggacggcggggcctgggggacc  
GI uGI nArgGI uAI aVal PheProPheGI nProGI ySerVal AI aGI uVal SerI I eThr  
gagcagcgggaggctgtctttcccttccagcctggaagtgttgacagaggtgtccatcacc  
PheAspGI nAI aAsnLeuThrVal LysLeuProAspGI yTyrGI uPheLysPheProAsn  
ttcgaccaggccaacctgacctcaagctgccagatggatacagagtcaagtccccaac  
ArgLeuAsnLeuGI uAI aI I eAsnTyrMetAI aAI aAspGI yAspPheLysI I eLysSer  
cgctcaacctggaggccatcaactacatggcagctgacggtgacttcaagatcaaactcg  
Val AI aPheAspGI yLeuAsnAspI I ePheGI uAI aGI nLysI I eGI uTrpHi sGI u\*\*\*  
gtggcctttgacggactgaatgacatcttccaagcacagaaaaatcgagtggcatgagtag  
aatc



**Figure S15. Galectin 2 (Galectin 2)**

MetThrGI yGI uLeuGI uVal LysAsnMetAsp  
ggatccgatcttggaggatgattaaatgacgggggaacttgaggtaagaacatggac  
MetLysProGI ySerThrLeuLysI I eThrGI ySerI I eAl aAspGI yThrAspGI yPhe  
atgaagccgggttcaaccctgaagatcacaggcagcatcgccgatggcactgatggctt  
Val I I eAsnLeuGI yGI nGI yThrAspLysLeuAsnLeuHi sPheAsnProArgPheSer  
gtaattaatctgggcccaggggacagacaagctgaacctgcatttcaaccctcgcttcagc  
GI uSerThrI I eVal MetAsnSerLeuAspGI ySerAsnTrpGI yGI nGI uGI nArgGI u  
gaatccaccattgtctcctaactcattggacggcagcaactgggggcaagaacaacgggaa  
AspHi sLeuSerPheSerProGI ySerGI uVal LysPheThrVal ThrPheGI uSerAsp  
gatcacctgtcgttcagcccagggtcagaggccaagttcacagtgaccttgagagtgc  
LysPheLysVal LysLeuProAspGI yHi sGI uLeuThrPheProAsnArgLeuGI yHi s  
aaattcaaggtgaagctgccagatgggcacgagctgacttttccaacaggctgggtcac  
SerHi sLeuSerTyrLeuSerVal ArgGI yGI yPheAsnMetSerSerPheLysLeuLys  
agccacctgagctacctgagcgttaagggcggttcaacatgtcctcttcaagttaaaa  
GI uGI yLeuAsnAspI I ePheGI uAl aGI nLysI I eGI uTrpHi sGI u\*\*\*  
gaaggactgaatgacatcttcgaagcacagaaaatcgagtggcatgagtagaattc

**Figure S16. Galectin 3 (Galectin 3)**

MetGI yProLeuI I eVal ProTyrAsnLeuProLeu  
ggatccgatcttggaggatgattaaatggggccactgatgtgccttataacctgcctttg  
ProGI yGI yVal Val ProArgMetLeuI I eThrI I eLeuGI yThrVal LysProAsnAl a  
cctgggggagtggtgcctcgcatgctgataacaattctgggcacggtgaagcccaatgca  
AsnArgI I eAl aLeuAspPheGI nArgGI yAsnAspVal Al aPheHi sPheAsnProArg  
aacagaattgctttagatttccaagagggaatgatgtgccttccactttaaccacgc  
PheAsnGI uAsnAsnArgArgVal I I eVal SerAsnThrLysLeuAspAsnAsnTrpGI y  
ttcaatgagaacaacaggagagtcattgtttcaaatacaaagctggataataactgggga  
ArgGI uGI uArgGI nSerVal PheProPheGI uSerGI yLysProPheLysI I eGI nVal  
aggaagaagacagctcgggtttccatttgaaagtgggaaaccattcaaaaacaagta  
LeuVal GI uProAspHi sPheLysVal Al aVal AsnAspAl aHi sLeuLeuGI nTyrAsn  
ctggttgaacctgaccacttcaaggttcagtgatgatgctcacttgttgagtacaat  
Hi sArgVal LysLysLeuAsnGI uI I eSerLysLeuGI yI I eSerGI yAspI I eAspLeu  
catcgggttaaaaaactcaatgaaatcagcaaaactgggaatttctggtgacatagacctc  
ThrSerAl aSerTyrThrMetI I eGI yLeuAsnAspI I ePheGI uAl aGI nLysI I eGI u  
accagtgttcatataccatgataggactgaatgacatcttcgaagcacagaaaatcgag  
TrpHi sGI u\*\*\*  
tggcatgagtagaattc

**Figure S17. Galectin 7 (Galectin 7)**

MetAl aSerAsnVal ProHi sLysSerSerLeuPr  
ggatccgatccttgaggatgattaaatggccccaacgtccccacaagtccctcactgcc  
oGI uGI yI I eArgProGI yThrVal LeuArgI I eArgGI yLeuVal ProProAsnAl aSe  
cgagggcatccgccctggcacgggtgctgctgctatcgcggcttggttcctcccaatgccag  
rArgPheHi sVal AsnLeuLeuSerGI yGI uGI uGI nGI ySerAspAl aAl aLeuHi sPh  
caggttccatgtaaacctgctgctcgggggaggagcagggctccgatgccgcgctgcattt  
eAsnProArgLeuAspThrSerGI uVal Val PheAsnSerLysGI uGI nGI ySerTrpGI  
caacccccggctggacacgtcggaggtggtcttcaacagcaaggagcaaggctcctgggg  
yArgGI uGI uArgGI yProGI yVal ProPheGI nArgGI yGI nProPheGI uVal LeuI I  
ccgcgaggagcgcgggcccgggcttcccttccagcgcgggcagcccttcgaggtgctcat  
eI I eAl aSerAspAspGI yPheLysAl aVal Val GI yAspAl aGI nTyrHi sHi sPheAr  
catcgcgtcagacgacggcttcaaggccgtggttggggacgccagaccaccacttccg  
gHi sArgLeuProLeuAl aArgVal ArgLeuVal GI uVal GI yGI yAspVal GI nLeuAs  
ccaccgcctgccgtggcgcgcgtgctgctggtggaggtgggcggggacgtgcagctgga  
pSerVal ArgI I ePheGI yLeuAsnAspI I ePheGI uAl aGI nLysI I eGI uTrpHi sGI  
ctccgtgaggatcctcggactgaatgacatcttcgaagcacagaaaatcgagtggcatga  
u\*\*\*  
gtagaattc

**Figure S18. Galectin 4 N-terminal CRD (Galectin 4N)**

MetAl aProTyrTyrGI nProI I eProGI yGI yLe  
ggatccgatcttggaggatgattaaatggcccccttactaccagcccatcccgggaggct  
uAsnVal GI yMetSerVal TyrI I eGI nGI yVal AI aSerGI uHi sMetLysArgPhePh  
caacgtgggaatgtctgtttacatccaaggagtggccagcgagcacatgaagcggttctt  
eVal AsnPheVal Val GI yGI nAspProGI ySerAspVal AI aPheHi sPheAsnProAr  
cgtgaactttgtggttgggcaggatccgggctcagacgtcgccctccacttcaatccgcg  
gPheAspGI yTrpAspLysVal Val PheAsnThrLeuGI nGI yGI yLysTrpGI ySerGI  
gtttgacggctgggacaagggtggtcttcaacacgttgcagggcggaagtggggcagcga  
uGI uArgLysArgSerMetProPheLysLysGI yAI aAI aPheGI uLeuVal PheI I eVa  
ggagaggaagaggagcatgcccttcaaaaagggtgccgctttgagctggtcttcatagt  
I LeuAI aGI uHi sTyrLysVal Val Val AsnGI yAsnProPheTyrGI uTyrGI yHi sAr  
cctggctgagcactacaagggtggtgtaaatggaaatcccttctatgagtacgggcaccg  
gLeuProLeuGI nMetVal ThrHi sLeuGI nVal AspGI yAspLeuGI nLeuGI nSerI I  
gcttcccctacagatggtcaccacctgcaagtggatggggatctgcaacttcaatcaat  
eGI yLeuAsnAspI I ePheGI uAI aGI nLysI I eGI uTrpHi sGI u\*\*\*  
cggactgaatgacatcttcaagcacagaaaatcgagtggcatgagtaggaattc

**Figure S19. Galectin 4 C-terminal CRD (Galectin 4C)**

MetAl aThrPheAsnProProVal ProTyrPheGI  
ggatccgatcttggaggatgattaaatggctaccttcaaccgcctgtgcatatttcgg  
yArgLeuGI nGI yGI yLeuThrAI aArgArgThrI I eI I eI I eLysGI yTyrVal ProPr  
gaggctgcaaggagggtcacagctcgaagaacctcatcatcaagggtatgtgcctcc  
oThrGI yLysSerPheAI aI I eAsnPheLysVal GI ySerSerGI yAspI I eAI aLeuHi  
cacaggcaagagctttgctatcaacttcaagggtgggctcctcaggggacatagctctgca  
sI I eAsnProArgMetGI yAsnGI yThrVal Val ArgAsnSerLeuLeuAsnGI ySerTr  
cattaatccccgcatgggcaacgggtaccgtggtccggaacagccttctgaaatggctcgtg  
pGI ySerGI uGI uLysLysI I eThrHi sAsnProPheGI yProGI yGI nPhePheAspLe  
gggctccgaggagaagaagatcaccacaacccatttgggtcccggacagtctttgatct  
uSerI I eArgSerGI yLeuAspArgPheLysVal TyrAI aAsnGI yGI nHi sLeuPheAs  
gtccattcgctctggcttggatcgcttcaagggttacgccaatggccagcacctcttga  
pPheAI aHi sArgLeuSerAI aPheGI nArgVal AspThrLeuGI uI I eGI nGI yAspVa  
ctttgccccatcgctctcggccttccagaggggtggacacatggaaatccagggatgatg  
I ThrLeuSerTyrVal GI nI I eGI yLeuAsnAspI I ePheGI uAI aGI nLysI I eGI uTr  
caccttgtcctatgtccagatcggactgaatgacatcttcaagcacagaaaatcgagtg  
pHi sGI u\*\*\*  
gcatgagtaggaattc

**Figure S20. Galectin 8 C-terminal CRD (Galectin 8C)**

MetAl aGI nLeuArgLeuProPheAl aAl aArgLe  
ggatccgatcttggaggatgattaaatggctcagcttaggctgccattcgctgcaaggtt  
uAsnThrProMetGI yProGI yArgThrVal Val Val LysGI yGI uVal AsnAl aAsnAl  
gaacacccccatgggccctggacgaactgtcgtcgttaaaggagaagtgaatgcaaatgc  
aLysSerPheAsnVal AspLeuLeuAl aGI yLysSerLysAspI I eAl aLeuHi sLeuAs  
caaaagctttaatgttgacctactagcaggaaaatcaaaggatatgtctctacacttgaa  
nProArgLeuAsnI I eLysAl aPheVal ArgAsnSerPheLeuGI nGI uSerTrpGI yGI  
cccacgcctgaatattaaagcatttgtaagaaattcttttcttcaggagtcctggggaga  
uGI uGI uArgAsnI I eThrSerPheProPheSerProGI yMetTyrPheGI uMetI I eI I  
agaagagagaaaatattacctctttccatttagtcctgggatgtactttgagatgataat  
eTyrSerAspVal ArgGI uPheLysVal Al aVal AsnGI yVal Hi sSerLeuGI uTyrLy  
ttattcggatgtagagagttcaaggttgacagtaaatggcgtacacagcctggagtaca  
sHi sArgPheLysGI uLeuSerSerI I eAspThrLeuGI uI I eAsnGI yAspI I eHi sLe  
acacagatttaaagagctcagcagattgacacgcctggaaattaatggagacatccactt  
uLeuGI uVal ArgSerTrpGI yLeuAsnAspI I ePheGI uAl aGI nLysI I eGI uTrpHi  
actggaagtaaggagctggggactgaatgacatcttcaagcacagaaaatcgagtggca  
sGI u\*\*\*  
tgagtagaattc

**Figure S21. Galectin 9 N-terminal CRD (Galectin 9N)**

MetAl aSerGI nAl aProTyrLeuSerProAl a  
ggatccgatcttggaggatgattaaatggcttcccaggctcccacctgagtccagct  
Val ProPheSerGI yThrI I eGI nGI yGI yLeuGI nAspGI yLeuGI nI I eThrVal Asn  
gtcccccttttctgggactattcaaggaggctccaggacggacttcagatcactgtcaat  
GI yThrVal LeuSerSerSerGI yThrArgPheAl aVal AsnPheGI nThrGI yPheSer  
gggaccgttctcagctccagtggaaccagggttgctgtgaacttcagactggcttcagt  
GI yAsnAspI I eAl aPheHi sPheAsnProArgPheGI uAspGI yGI yTyrVal Val Ser  
ggaaatgacattgccttccacttcaaccctcggttgaagatggagggtagtgggtgctg  
AsnThrArgGI nAsnGI ySerTrpGI yProGI uGI uArgLysThrHi sMetProPheGI n  
aacacgaggcagaacggaagctgggggcccaggagaggaagacacacatgcctttccag  
LysGI yMetProPheAspLeuSerPheLeuVal GI nSerSerAspPheLysVal MetVal  
aaggggatgccctttgacctctcttcttctgggtgcagagctcagattcaaggtgatgggt  
AsnGI yI I eLeuPheVal GI nTyrPheHi sArgVal ProPheHi sArgVal AspThrI I e  
aacggatctcttctcgtgcagctacttccaccgctgcccttccaccgtgtggacaccatc  
SerVal AsnGI ySerVal GI nLeuSerTyrI I eSerPheGI nGI yLeuAsnAspI I ePhe  
tccgtcaatggctctgtgcagctgtcctacatcagcttccagggactgaatgacatctt  
GI uAl aGI nLysI I eGI uTrpHi sGI u\*\*\*  
gaagcacagaaaaatcgagtggcatgagtaggaattc

**Figure S22. Galectin 9 C-terminal CRD (Galectin 9C)**

MetThrProAl aI I eProProMetMetTyrProHi  
ggatccgatcttggaggatgattaaatgactcccgccatcccacatgatgtaccccc  
sProAl aTyrProMetProPheI I eThrThrI I eLeuGI yGI yLeuTyrProSerLysSe  
ccccgcctatccgatgcctttcatcaccacatcttgggagggctgtacccatccaagtc  
rI I eLeuLeuSerGI yThrVal LeuProSerAl aGI nArgPheHi sI I eAsnLeuCysSe  
catcctctgtcaggcactgtcctgcccagtgctcagaggttccacatcaacctgtgct  
rGI yAsnHi sI I eAl aPheHi sLeuAsnProArgPheAspGI uAsnAl aVal Val ArgAs  
tgggaaccacatcgcttccacctgaacccccgttttgatgagaaatgctgtgggtccgcaa  
nThrGI nI I eAspAsnSerTrpGI ySerGI uGI uArgSerLeuProArgLysMetProPh  
caccagatcgacaactcctgggggtctgaggagcgaagctgccccgaaaaatgccctt  
eVal ArgGI yGI nSerPheSerVal TrpI I eLeuSerGI uAl aHi sSerLeuLysVal Al  
cgtccgtggccagagcttctcagtggtgatctgtccgaagctcactcgctcaaggtggc  
aVal AspGI yGI nHi sLeuPheGI uTyrTyrHi sArgLeuArgAsnLeuProThrI I eAs  
cgtggatggctcagcacctgttgaatactaccatcgctgaggaacctgccaccatcaa  
nArgLeuGI uVal GI yGI yAspI I eGI nLeuThrHi sVal GI nThrGI yLeuAsnAspI I  
cagactggaagtggggggcgacatccagctgacccatgtgcagacaggactgaatgacat  
ePheGI uAl aGI nLysI I eGI uTrpHi sGI u\*\*\*  
cttcaagcacagaaaaatcgagtggcatgagtagaattc

**Figure S23. Sialoadhesin (Siglec 1)**

MetAl aSerTrpGI yVal SerSerProGI nAsp  
ggatccgatccttgaggatgattaaatggcaagctgggggtgttagcagtcgcaggat

Val GI nGI yVal LysGI ySerAl aLeuLeuI eProCysI ePheSerPheProAl aAsp  
gttcaggggtgtaaaggtagcgcactgctgattccgtgtat t t t tagc t t t ccggcagat

Val GI uVal ProAspGI yI eThrAl aI eTrpTyrTyrAspTyrSerGI yGI nArgGI n  
gttgaagttccggatgggtattaccgcaatctgggtattatgattatcaggtcagcgtcag

Val Val SerHi sSerAl aAspProLysLeuVal GI uAl aArgPheArgGI yArgThrGI u  
gttgtagccatagcgcagatccgaaactgggtgaagcacgt t t t cgtggtcgtaccgaa

PheMetGI yAsnProGI uHi sArgVal CysAsnLeuLeuLeuLysAspLeuGI nProGI u  
t t t atgggtaatccggaacatcgtg t t t gtaatctgctgctgaaagatctgcagccgaa

AspSerGI ySerTyrAsnPheArgPheGI uI eSerGI uVal AsnArgTrpSerAspVal  
gatagcggtagctataact t t t cgt t t t gaaatcagcgaagtgaaccgttggagtgatgtt

LysGI yThrLeuVal ThrVal ThrGI uAl aLeuAsnAspI ePheGI uAl aGI nLysI e  
aaaggcaccctgggtaccgttaccgaagcactgaatgacatcttcaagcacagaaaatc

GI uTrpHi sGI u\*\*\*  
gagtggcatgagtagaattc

**Figure S24. CD33 (Siglec 3)**

ggatccgatccttgaggatgattaa

MetAl aAspProAsnPheTrpLeuGI nVal GI nGI uSerVal ThrVal GI nGI uGI yLeu  
atggccgatccgaat t t t tggctgcagggtcaagaaagcgttaccgttcaagaaggctctg

Al aVal LeuVal ProCysThrPhePheHi sProI eProTyrTyrAspLysAsnSerPro  
gcagttctggttccgtgtacct t t t tcatccgat tccgtattacgacaaaaacagtcgg

Val Hi sGI yTyrTrpPheArgGI uGI yAl aI eI eSerArgAspSerProVal Al aThr  
gttcatggttattggtttctggaaggtgcaattat tagccgtgtagtccggttgccacc

AsnLysLeuAspGI nGI uVal GI nGI uGI uThrGI nGI yArgPheArgLeuLeuGI yAsp  
aataaactggatcaagaagtgcaagaagaaaccagggtcgt t t t cgtctgctgggtgat

ProSerArgAsnAsnCysSerLeuSerI eVal AspAl aArgArgArgAspAsnGI ySer  
ccgagccgtaataattgtagcctgagcattgttgatgcacgtcgtcgtgataatggtagc

TyrPhePheArgMetGI uArgGI ySerThrLysTyrSerTyrLysSerProGI nLeuSer  
t t t t t t cgtatggaacgtggcagcaccaaatatagttataaaagtccgcagctgagc

Val Hi sVal ThrAspAl aLeuAsnAspI ePheGI uAl aGI nLysI eGI uTrpHi sGI u  
gttcatgttaccgatgcactgaatgacatcttcaagcacagaaaatcgagtggcatgag

\*\*\*  
tagaattc

**Figure S25. Siglec 5 (Siglec 5)**

MetAl aGI uLysProVal TyrGI uLeuGI nVal  
ggatccgatcttggaggatgattaaatggcagaaaaaccggtgatgaactgcaggtt  
GI nLysSerVal ThrVal GI nGI uGI yLeuAl aVal LeuVal ProCysSerPheSerTyr  
cagaaaagcgttaccggttcaagaaggctggcagttctgggtccggtgtagcttagctat  
ProTrpArgSerTrpTyrSerSerProProLeuTyrVal TyrTrpPheArgAspGI yGI u  
ccgtggcgttagctgggtatagcagccctccgctgatgtttattggtttcggtgatggtgaa  
I I eProTyrTyrAl aGI uVal Val Al aThrAsnAsnProAspArgArgVal LysProGI u  
atcccgattatgcagaagttggttgaaccaataatccggatcgtcgtgttaaaccggaa  
ThrGI nGI yArgPheArgLeuLeuGI yAspVal GI nLysLysAsnCysSerLeuSerI I e  
acacagggctggttttcgctgctgctgggtgatgtgcagaaaaaaaactgtagcctgagcatt  
GI yAspAl aArgMetGI uAspThrGI ySerTyrPhePheArgVal GI uArgGI yArgAsp  
ggtgatgcacgtatggaagataccggtagctatttttccggtgtgaacgtggccgtgat  
Val LysTyrSerTyrGI nGI nAsnLysLeuAsnLeuGI uVal ThrAl aLeuAsnAspI I e  
gtgaagtatagctatcagcagaataaactgaaatctggaagtaccgcactgaaatgacatc  
PheGI uAl aGI nLysI I eGI uTrpHi sGI u\*\*\*  
ttcgaagcacagaaaatcgagtggcatgagtagaattc

**Figure S26. Siglec 7 (Siglec 7)**

MetAl aGI nLysSerAsnArgLysAspTyrSer  
ggatccgatcttggaggatgattaaatggcccagaaaagcaatcgcaaagattattca  
LeuThrMetGI nSerSerVal ThrVal GI nGI uGI yMetAl aVal Hi sVal ArgCysSer  
ctgacctgacagagcagcgttaccggttcaagagggatggcagttcatgttcggtgtagc  
PheSerTyrProVal AspSerGI nThrAspSerAspProVal Hi sGI yTyrTrpPheArg  
tttagctatccggttgatagccagaccgatagcgtatccggttcatgggtattggtttcgt  
Al aGI yAsnAspI I eSerTrpLysAl aProVal Al aThrAsnAsnProAl aTrpAl aVal  
gcaggaatgatattagctggaaagcaccggttgccaccaataatccggcatgggcagtt  
GI nGI uGI uThrArgAspArgPheHi sLeuLeuGI yAspProGI nThrLysAsnCysThr  
caagaagaaacacgcgatcgttttcatctgctgggtgatccgcagacaaaaatgtacc  
LeuSerI I eArgAspAl aArgMetSerAspAl aGI yArgTyrPhePheArgMetGI uLys  
ctgagcattcgtgatgcacgtatgagtgatgcaggctgttatttctttcgtatggaaaaa  
GI yAsnI I eLysTrpAsnTyrLysTyrAspGI nLeuSerVal AsnVal ThrAl aLeuAsn  
ggcaacatcaaatggaactacaaatgatcagctgagcgttaattgttaccgccctgaaat  
AspI I ePheGI uAl aGI nLysI I eGI uTrpHi sGI u\*\*\*  
gacatcttcgaagcacagaaaatcgagtggcatgagtagaattc

**Figure S27. Siglec 9 (Siglec 9)**

MetAl aGI nThrSerLysLeuLeuThrMetGI n  
ggatccgatcttggaggatgattaaatggcacagaccagcaaaactgctgacatgcag  
SerSerVal ThrVal GI nGI uGI yLeuAl aVal Hi sVal ProCysSerPheSerTyrPro  
agcagcgttaccggttcaagagggtttagcagttcatgttccgtgtagctttagctatccg  
SerHi sGI yTrpI I eTyrProGI yProVal Val Hi sGI yTyrTrpPheArgGI uGI yAl a  
agccatggttggatttatccgggtcctgttgttcatggttattggttctgtgaaggtgca  
AsnThrAspGI nAspAl aProVal Al aThrAsnAsnProAl aArgAl aVal TrpGI uGI u  
aataccgatcaggatgcaccgggtgccaccaataatccggcacgtgcagtttggaagaa  
ThrArgAspArgPheHi sLeuLeuGI yAspProHi sThrLysAsnCysThrLeuSerI I e  
accggtgatcgttttcatctgctgggtgatccgcatacacaataatgtaccctgagcatt  
ArgAspAl aArgArgSerAspAl aGI yArgTyrPhePheArgMetGI uLysGI ySerI I e  
cgtgatgcacgtcgttccagatgcaggctcgttatttcttctgtatggaaaaggcagcatc  
LysTrpAsnTyrLysHi sHi sArgLeuSerVal AsnVal ThrAl aLeuAsnAspI I ePhe  
aatggaactataaacatcatcgtctgagcgttaatgttaccgcactgaatgacatctt  
GI uAl aGI nLysI I eGI uTrpHi sGI u\*\*\*  
gaagcacagaaaatcgagtggcatgagtagaattc

**Figure S28. Siglec 11 (Siglec 11)**

ggatccgatcttggaggatgattaa  
MetLeuAsnLysAspProSerTyrSerLeuGI nVal GI nArgGI nVal ProVal ProGI u  
atgctgaataaagatccgagctatagcctgcaggttcagcgtcaggttccggttccggaa  
GI yLeuAl aVal I I eVal SerCysAsnLeuSerTyrProArgAspGI yTrpAspGI uSer  
ggctctggcagttattgttagctgtaatctgagctatccgcgtgatggttgggatgaaagc  
ThrAl aAl aTyrGI yTyrTrpPheLysGI yArgThrSerProLysThrGI yAl aProVal  
accgcagcatatggttattggtttaaaggctcgtaccagtcggaaaacaggtgcaccggtt  
Al aThrAsnAsnGI nSerArgGI uVal GI uMetSerThrArgAspArgPheGI nLeuThr  
gccaccaataatcagagccgtgaagttgaaatgagcaccctgatcgtttttagctgacc  
GI yAspProGI yLysGI ySerCysSerLeuVal I I eArgAspAl aGI nArgGI uAspGI u  
ggtgatcctggtaaaggtagctgtagcctgggttattcgtgatgcacagcgtgaagatgaa  
Al aTrpTyrPhePheArgVal GI uArgGI ySerArgVal ArgHi sSerPheLeuSerAsn  
gcatggtatTTTTTccgtgttgaacgtggtagccgtgttctgtcatagcttctgagcaat  
Al aPhePheLeuLysVal ThrAl aLeuAsnAspI I ePheGI uAl aGI nLysI I eGI uTrp  
gcattTTTTTctgaaagttaccgccctgaatgacatcttcaagcacagaaaatcgagtgg  
Hi sGI u\*\*\*  
catgagtagaattc



Figure S29. Intellectin 1 (Intellectin 1)

MetAl aLeu  
taaattggccctg

AsnAspI I ePheGI uAl aGI nLysI I eGI uTrpHi sGI uGI ySerProSerLeuProArg  
aatgacatcttcgaagcacagaaaaatcgagtgccatgagggatccccatctctgcccaga

SerCysLysGI uI I eLysAspGI uSerProSerAl aPheAspGI yLeuTyrPheLeuArg  
agctgcaaggaatcaaagacgaaagccctagtgcatcttgatggcctgtatctctccgc

ThrGI uAsnGI yVal I I eTyrGI nThrPheCysAspMetThrSerGI yGI yGI yGI yTrp  
actgagaatgggtgttatctaccagacctctgtgacatgacctctgggggtggcggctgg

ThrLeuVal Al aSerVal Hi sGI uAsnAspMetArgGI yLysCysThrVal GI yAspArg  
accctgggtggccagcgtgcacgagaatgacatgctgggaagtgcacggtgggcgatcgc

TrpSerSerGI nGI nGI ySerLysAl aVal TyrProGI uGI yAspGI yAsnTrpAl aAsn  
tggctccagtcagcagggcagcaagcagctctaccagagggggacggcaactgggccaac

TyrAsnThrPheGI ySerAl aGI uAl aAl aThrSerAspAspTyrLysAsnProGI yTyr  
tacaacacctttggatctgcagaggcggccacgagcgtgactacaagaacctggctac

TyrAspI I eGI nAl aLysAspLeuGI yI I eTrpHi sVal ProAsnLysSerProMetGI n  
tacgacatccaggccaaggacctgggcatctggcacgtgcccaataagccccatgacg

Hi sTrpArgAsnSerSerLeuLeuArgTyrArgThrAspThrGI yPheLeuGI nThrLeu  
cactggagaaacagctccctgctgaggtaccgcacggacactggcttctccagacactg

GI yHi sAsnLeuPheGI yI I eTyrGI nLysTyrProVal LysTyrGI yGI uGI yLysCys  
ggacataatctgtttggcatctaccagaaatatccagtgaaataggagaaggaaagtgt

TrpThrAspAsnGI yProVal I I eProVal Val TyrAspPheGI yAspAl aGI nLysThr  
tggactgacaacggcccgggtgatccctgtggctctatgatcttggcgacgccagaaaaca

Al aSerTyrTyrSerProTyrGI yGI nArgGI uPheThrAl aGI yPheVal GI nPheArg  
gcatcttattactcaccctatggccagcgggagttcactgcgggattgttcagttcagg

Val PheAsnAsnGI uArgAl aAl aAsnAl aLeuCysAl aGI yMetArgVal ThrGI yCys  
gtatcttaataacgagagagcagccaacgcctgtgtgctggaaatgagggtcaccggatgt

AsnThrGI uHi sHi sCysI I eGI yGI yGI yGI yTyrPheProGI uAl aSerProGI nGI n  
aacactgagcaccactgcattgggtggaggaggatacttccagaggccagctcccagcag

CysGI yAspPheSerGI yPheAspTrpSerGI yTyrGI yThrHi sVal GI yTyrSerSer  
tgtggagatctctctgggttttgattggagtgatataggaactcatgttggttacagcagc

SerArgGI uI I eThrGI uAl aAl aVal LeuLeuPheTyrArg\*\*\*  
agccgtgagataactgaggcagctgtgcttctattctatcgttgaattc

**Figure S30. Intelectin 2 (Intelectin 2)**

MetAl aLeuAsnAspI l ePheGI uAl aGI nLysI l eGI uTrpHi sGI uGI y  
taaattggccctgaatgacatcttcgaagcacagaaaatcgagtggcatgagggga

SerPheSerSerLeuProArgSerCysLysGI ul l eLysGI uArgSerHi sSerAl aGI y  
tccttttcttccctgcctagaagctgcaaagaaatcaaggaacgcagccatagtgagggt

AspGI yLeuTyrPheLeuArgThrLysAsnGI yVal Val TyrGI nThrPheCysAspMet  
gatggcctgtatcttccgcaccaagaatgggtgttgtctaccagaccttctgtgacatg

ThrSerGI yGI yGI yGI yTrpThrLeuVal Al aSerVal Hi sGI uAsnAspMetArgGI y  
acttctgggggtggcggctggaccctgggtggccagcgtgcacgagaatgacatgctgtggg

LysCysThrVal GI yAspArgTrpSerSerGI nGI nGI yAsnLysAl aAspTyrProGI u  
aagtgcacgggtgggtgatcgctgggtccagtcagcagggcaacaaagcagactaccagag

GI yAspGI yAsnTrpAl aAsnTyrAsnThrPheGI ySerAl aGI uAl aAl aThrSerAsp  
ggggatggcaactgggccaactacaacaccttggatctgcagaggcggccacgagcgt

AspTyrLysAsnProGI yTyrTyrAspI l eGI nAl aLysAspLeuGI yI l eTrpHi sVal  
gactacaagaacctgggtactacgacatccaggccaaggacctgggcatctggcatgtg

ProAsnLysSerProMetGI nHi sTrpArgAsnSerAl aLeuLeuArgTyrArgThrAsn  
cccaacaagtccccatgcagcattggagaaacagcgccttctgaggtaccgcaccaac

ThrGI yPheLeuGI nArgLeuGI yHi sAsnLeuPheGI yI l eTyrGI nLysTyrProVal  
actggcttctccagagactgggacataatctgttggcatctaccagaaataccagtg

LysTyrArgSerGI yLysCysTrpAsnAspAsnGI yProAl al l eProVal Val TyrAsp  
aaatacagatcagggaaatgttggaaatgacaatggcccagccataacctgtggtctatgac

PheGI yAspAl aLysLysThrAl aSerTyrTyrSerProTyrGI yGI nArgGI uPheVal  
tttgggtgatgctaagaagactgcatcttattactcaccgtatggtcaacgggaatttgtt

Al aGI yPheVal GI nPheArgVal PheAsnAsnGI uArgAl aAl aAsnAl aLeuCysAl a  
gcaggattcgttcagttccgggtgtttaataacgagagagcagccaacgcccttgtgct

GI yI l eLysVal ThrGI yCysAsnThrGI uHi sHi sCysI l eGI yGI yGI yPhePhe  
gggataaaagt tactggctgtaacactgagcatcactgcatcgggtggaggagggttcttc

ProGI nGI yLysProArgGI nCysGI yAspPheSerAl aPheAspTrpAspGI yTyrGI y  
ccacagggcaaaccctcagtggtgggacttctccgccttggactgggatggatatgga

ThrHi sVal LysSerSerSerArgGI ul l eThrGI uAl aAl aVal LeuLeuPheTyr  
actcacgttaagagcagcagcagtcgggagataaacggaggcggctgtactctgttctat

Arg\*\*\*  
agatgaattc

**Figure S31. Mannose receptor R-type CRD (MMR-R)**

attacggattcactggaactctagataacgagggcaaaaatg <sup>Met</sup>

LysLysThrAl aI I eAl aI I aAl aVal Al aLeuAl aGl yPheAl aThrVal Al aGl nAl a  
aaaaagacagctatcgcgattgcagtgccactggctggtttcgcctaccgtagcgcaggcc

LeuLeuAspThrArgGI nPheLeuI I eTyrAsnGI uAspHi sLysArgCysVal AspAl a  
ctcctggacaccaggcaatTTTTaattctataatgaagatcacaagcgcTgcgtggatgca

Val SerProSerAl aVal GI nThrAl aAl aCysAsnGI nAspAl aGl uSerGI nLysPhe  
gtgagtcccagtgccgtccaaaccgcagcttgcaaccaggatgccgaatcacagaaattc

ArgTrpVal SerGI uSerGI nI I eMetSerVal Al aPheLysLeuCysLeuGI yVal Pro  
cgatgggtgtccgaatctcagattatgagtggtgcatttaaattatgcctgggagtgcc

SerLysThrAspTrpVal Al aI I eThrLeuTyrAl aCysAspSerLysSerGI uPheGI n  
tcaaaaacggactgggttgctatcactctctatgcctgtgactcaaaaagtgaatttcag

LysTrpGI uCysLysAsnAspThrLeuLeuGI yI I eLysGI yGI uAspLeuPhePheAsn  
aatgggagtgcaaaaatgacacacttttggggatcaaaggagaagatttatttttaac

TyrGI yAsnArgGI nGI uLysAsnI I eMetLeuTyrLysGI ySerGI yLeuTrpSerArg  
tacggcaacagacaagaaaagaatattatgctctacaagggatcgggtttatggagcagg

TrpLysI I eTyrGI yThrThrAspAsnLeuCysSerArgGI yTyrGI uAl aLeuAsnAsp  
tggagatctatggaaccacagacaatctgtgctccagaggttatgaagccctgaatgac

I I ePheGI uAl aGl nLysI I eGI uTrpHi sGI u\*\*\*  
atcttcgaagcacagaaaaatcgagtggcatgagtaggaattc

**Figure S32. Ficolin 1 / Ficolin M**

MetAl aLeuAsnAspI I ePheGI uAl aGI nLysI I eGI uTrpHi sGI uGI ySerCys  
taaattggccctgaatgacatcttcgaagcacagaaaaatcgagtggcatgagggatcctgt  
Al aThrGI yProArgAsnCysLysAspLeuLeuAspArgGI yTyrPheLeuSerGI yTrp  
gcgacaggccacgcaactgcaaggacctgctagaccgggggtatttcctgagcggctgg  
Hi sThrI I eTyrLeuProAspCysArgProLeuThrVal LeuCysAspMetAspThrAsp  
cacaccatctacctgccccgactgccggccccctgactgtgctctgtgacatggacacggac  
GI yGI yGI yTrpThrVal PheGI nArgArgMetAspGI ySerVal AspPheTyrArgAsp  
ggagggggctggaccgttttccagcggaggatggatggctctgtggacttctatcgggac  
TrpAl aAl aTyrLysGI nGI yPheGI ySerGI nLeuGI yGI uPheTrpLeuGI yAsnAsp  
tgggccgcatacaagcagggcttcggcagtcagctgggggagtctggctggggaatgac  
AsnI I eHi sAl aLeuThrAl aGI nGI ySerSerGI uLeuArgVal AspLeuVal AspPhe  
aacatccacgcccctgactgcccaggggaagcagcagctccgtgtagacctggtggacttt  
GI uGI yAsnHi sGI nPheAl aLysTyrLysSerPheLysVal Al aAspGI uAl aGI uLys  
gagggcaaccaccagtttgctaagtacaaatcattcaaggtggctgacgaggcagagaag  
TyrLysLeuVal LeuGI yAl aPheVal GI yGI ySerAl aGI yAsnSerLeuThrGI yHi s  
tacaagctggtactgggagcctttgtcgggggagcagtgagggtaatctctaacggggccac  
AsnAsnAsnPhePheSerThrLysAspGI nAspAsnAspVal SerSerSerAsnCysAl a  
aacaacaacttcttctccaccaaaagaccaagacaatgatgtgagtcttcgaattgtgct  
GI uLysPheGI nGI yAl aTrpTrpTyrAl aAspCysHi sAl aSerAsnLeuAsnGI yLeu  
gagaagttccaaggagcctgggtggtacgccgactgtcatgcttcaaacctcaatggtctc  
TyrLeuMetGI yProHi sGI uSerTyrAl aAsnGI yI I eAsnTrpSerAl aAl aLysGI y  
tacctcatgggacccccatgagagctatgccaatggtatcaactggagtgcggcgaagggg  
TyrLysTyrSerTyrLysVal SerGI uMetLysVal ArgProAl a\*\*\*  
tacaatatagctacaaggtgtcagagatgaaggtgcggccccgcctagaattc

**Figure S33. Chitinase 3-like lectin 2 / YKL39 (ChI3-L2)**

MetAl aLeuAsnAspI I ePheGI uAl aGI nLysI I eGI uTrpHi sGI u  
taaatggccctgaatgacatcttcgaagcacagaaaaatcgagtggcatgag

GI ySerTyrLysLeuVal CysTyrPheThrAsnTrpSerGI nAspArgGI nGI uProGI y  
ggatcctacaaactggtttgctactttaccaactgggtcccaggaccggcaggaaccagga

LysPheThrProGI uAsnI I eAspProPheLeuCysSerHi sLeuI I eTyrSerPheAl a  
aaattcaccctgagaatattgacccttcctatgctctcatctcatctattcattcgcc

SerI I eGI uAsnAsnLysVal I I eI I eLysAspLysSerGI uVal MetLeuTyrGI nThr  
agcatcgaaaacaacaaggttatcatcaaggacaagagtgaagtgatgctctaccagacc

I I eAsnSerLeuLysThrLysAsnProLysLeuLysI I eLeuLeuSerI I eGI yGI yTyr  
atcaacagtctcaaaaccaagaatcccaaaactgaaaaatctcttgtccatggagggtac

LeuPheGI ySerLysGI yPheHi sProMetVal AspSerSerThrSerArgLeuGI uPhe  
ctgtttgggtccaaaggggtccaccctatgggtggattctcttacatcacgcttggagttc

I I eAsnSerI I eI I eLeuPheLeuArgAsnHi sAsnPheAspGI yLeuAspVal SerTrp  
attaactccataatcctgtttctgaggaaccataactttgatggactggatgtaagctgg

I I eTyrProAspGI nLysGI uAsnThrHi sPheThrVal LeuI I eHi sGI uLeuAl aGI u  
atctaccagatcagaaagaaaacactcatttcactgtgctgat tcatgagttagcagaa

Al aPheGI nLysAspPheThrLysSerThrLysGI uArgLeuLeuLeuThrAl aGI yVal  
gcctttcagaaggacttcacaaaaatccaccaaggaaaggcttctcttgactgcgggcgta

SerAl aGI yArgGI nMetI I eAspAsnSerTyrGI nVal GI uLysLeuAl aLysAspLeu  
tctgcagggaggcaaatgattgataacagctatcaagttgagaaactggcaaaagatctg

AspPheI I eAsnLeuLeuSerPheAspPheHi sGI ySerTrpGI uLysProLeuI I eThr  
gatttcatcaacctcctgtcctttgacttccatgggtcttgggaaaagccccttatact

GI yHi sAsnSerProLeuSerLysGI yTrpGI nAspArgGI yProSerSerTyrTyrAsn  
ggccacaacagccctctgagcaaggggtggcaggacagaggccaagctcctactacaat

Val GI uTyrAl aVal GI yTyrTrpI I eHi sLysGI yMetProSerGI uLysVal Val Met  
gtggaatatgctgtgggtactggatacataagggaaatgccatcagagaaggtggtcatg

GI yI I eProThrTyrGI yHi sSerPheThrLeuAl aSerAl aGI uThrThrVal GI yAl a  
ggcatccccacataatgggcactccttcacactggcctctgcagaaaccaccgtgggggccc

ProAl aSerGI yProGI yAl aAl aGI yProI I eThrGI uSerSerGI yPheLeuAl aTyr  
cctgcctctggccctggagctgctggaccatcacagagtcttcaggcttctggcctat

TyrGI uI I eCysGI nPheLeuLysGI yAl aLysI I eThrArgLeuGI nAspGI nGI nVal  
tatgagatctgccagt tccctgaaaggagccaagatcacgcggctccaggatcagcaggtt

ProTyrAl aVal LysGI yAsnGI nTrpVal GI yTyrAspAspVal LysSerMetGI uThr  
ccctacgcagtcaaggggaaccagtgggtgggctatgatgatgtgaagagtatggagacc

LysVal GI nPheLeuLysAsnLeuAsnLeuGI yGI yAl aMetI I eTrpSerI I eAspMet  
aaggttcagttcttaaagaat ttaaacctgggaggagccatgatctggtctattgacatg

AspAspPheThrGI yLysSerCysAsnGI nGI yProTyrProLeuVal GI nAl aVal Lys  
gatgacttcaactggcaaatcctgcaaccagggcccttaccctcttgtccaagcagtcag

ArgSerLeuGI ySerLeu\*\*\*  
agaagccttggctccctgtgaattc

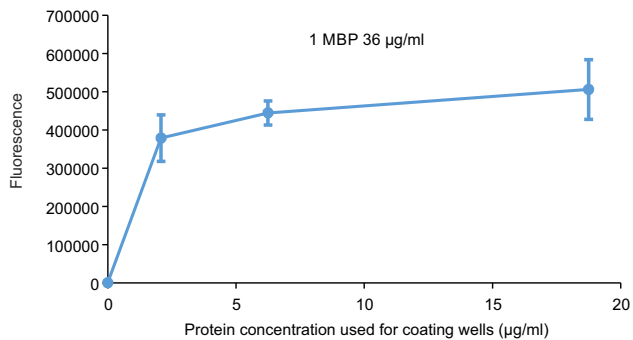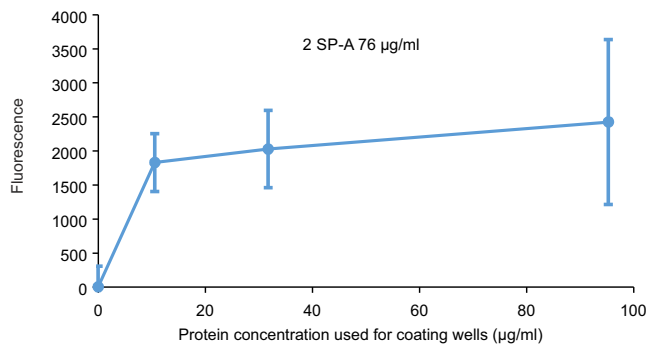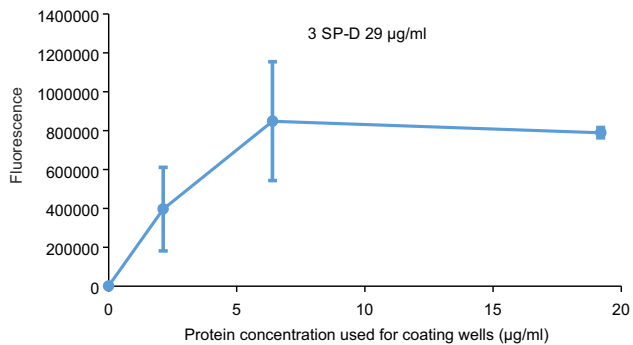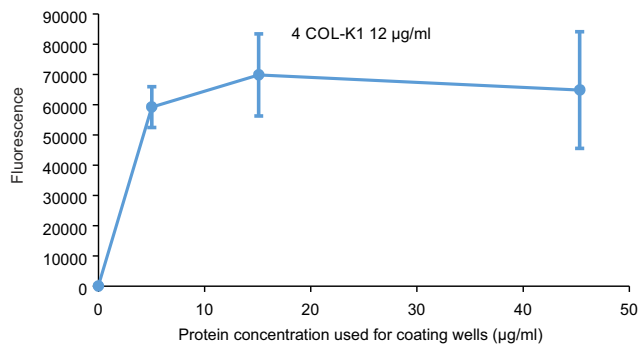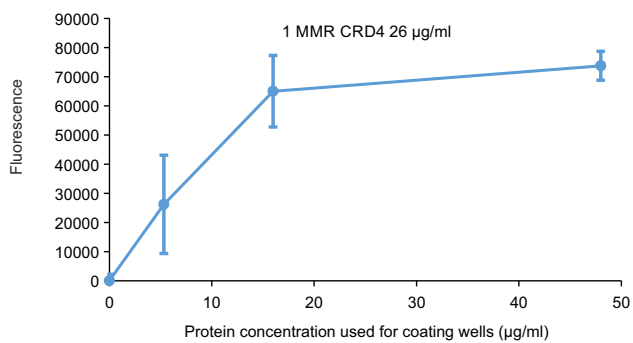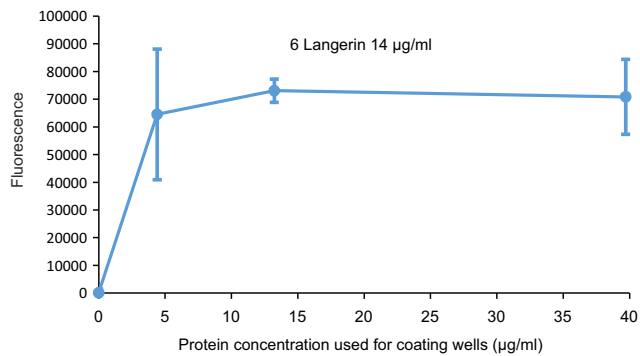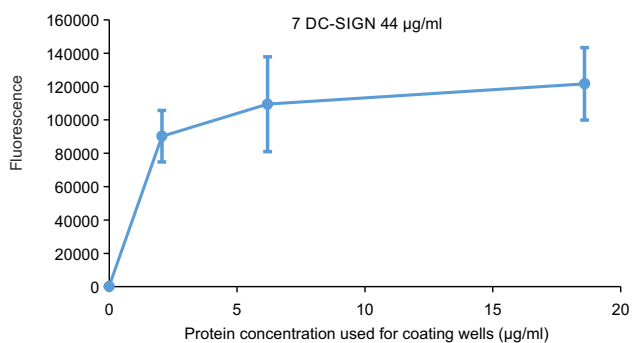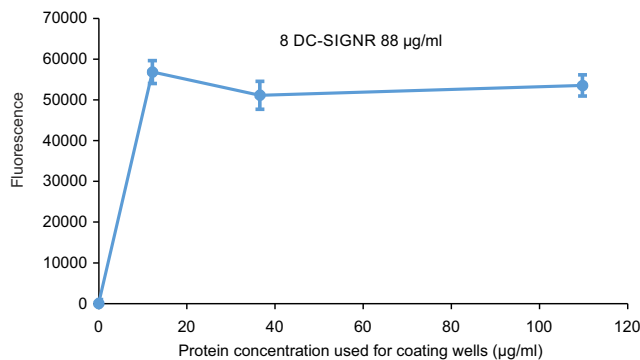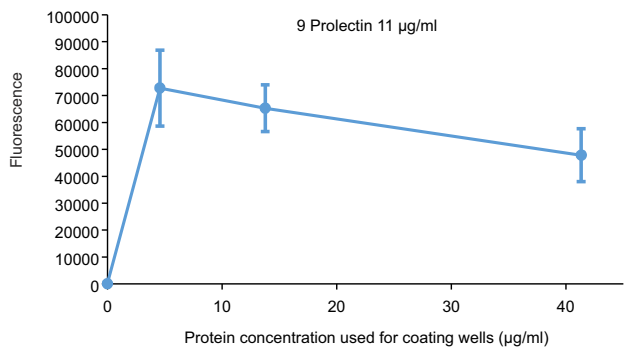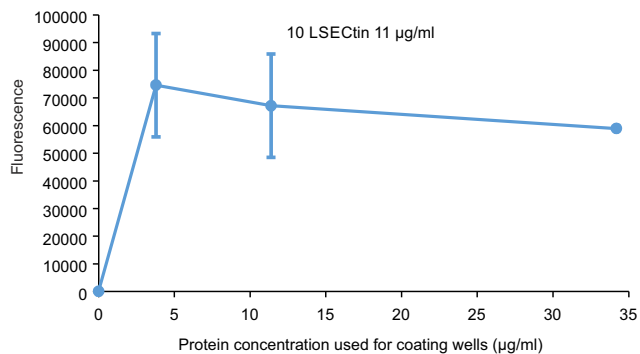

**Figure S34 (Part 1). Saturation curves for coating of assay wells.**

Concentrations of aliquots used to coat individual wells are indicated at the top of each panel.

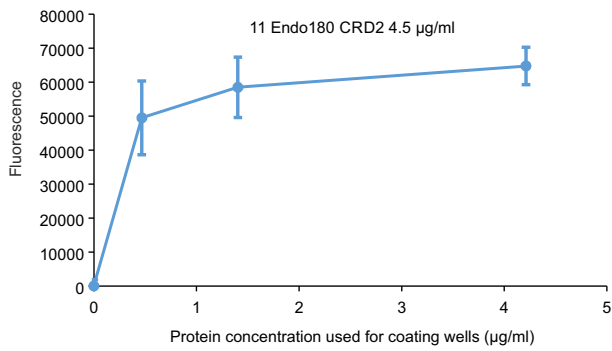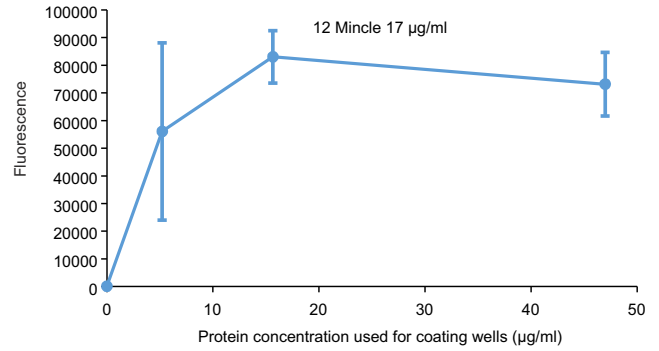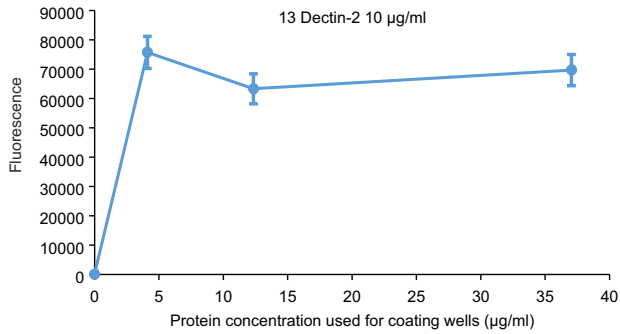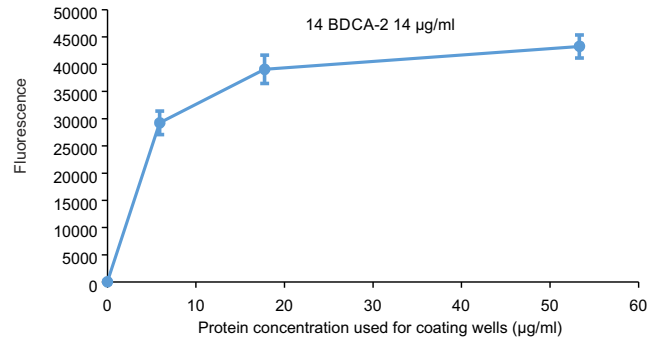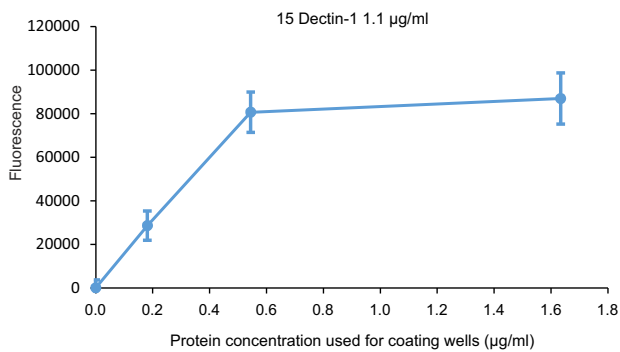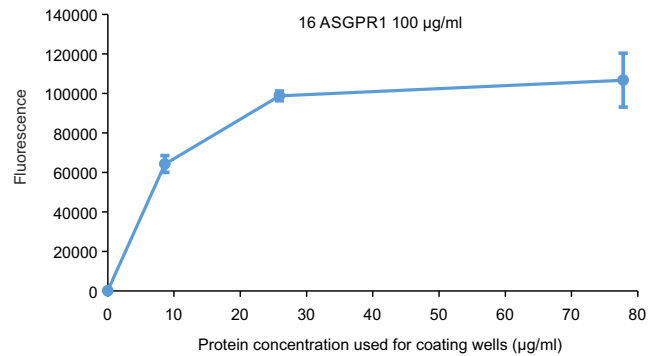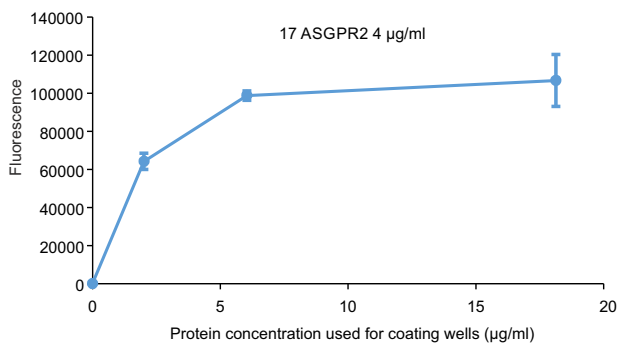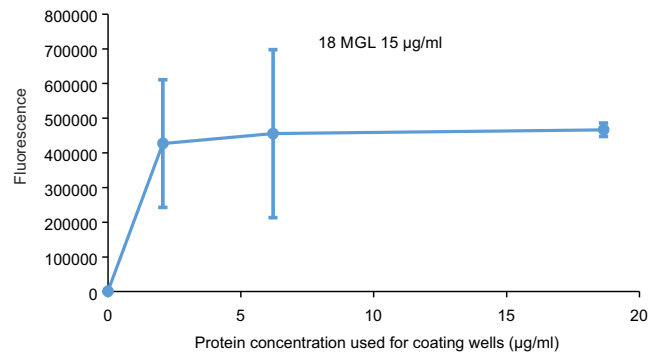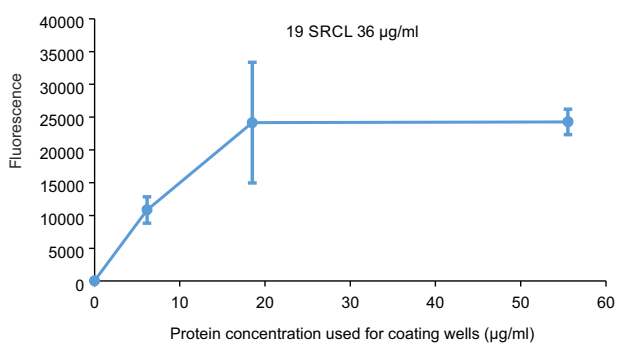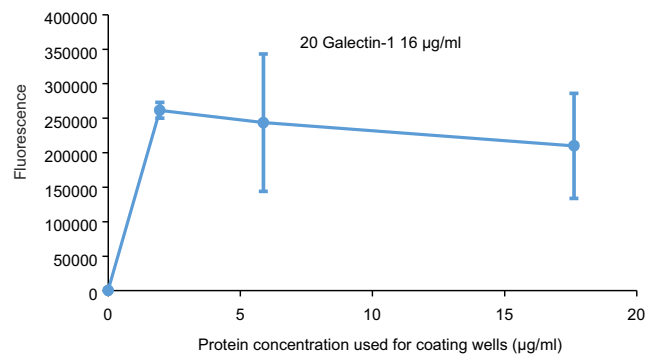

**Figure S34 (Part 2). Saturation curves for coating of assay wells.**

Concentrations of aliquots used to coat individual wells are indicated at the top of each panel.

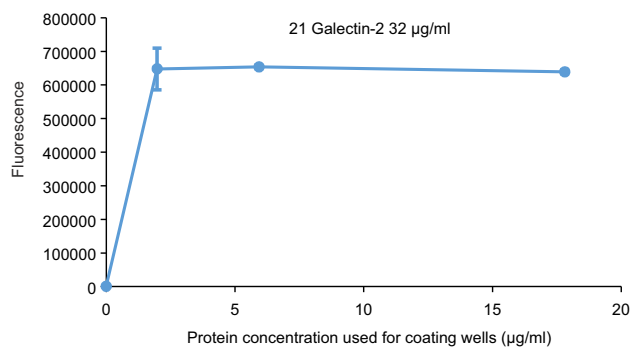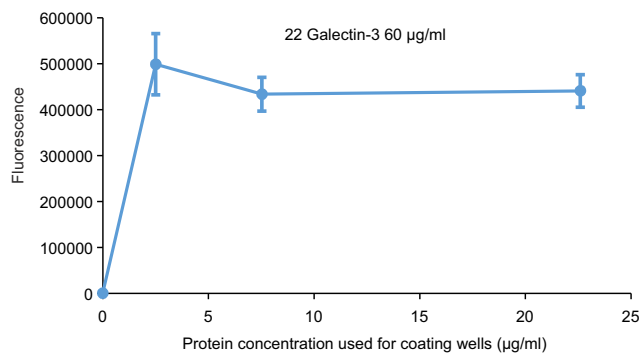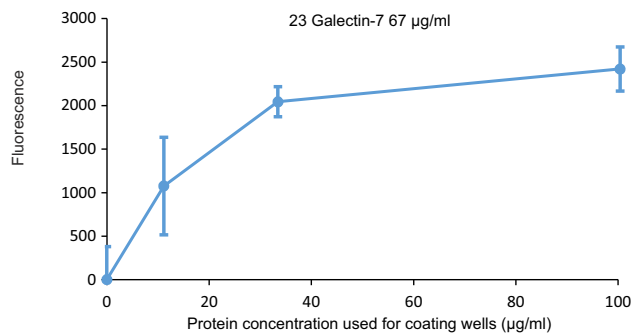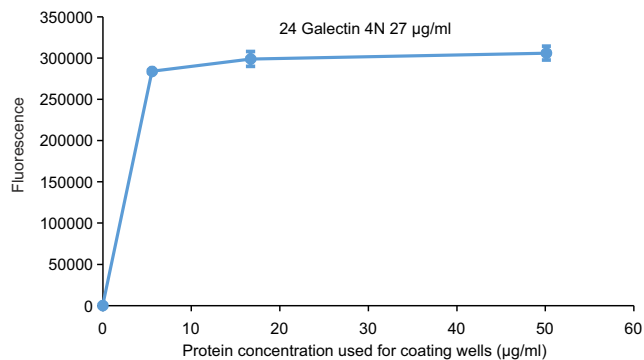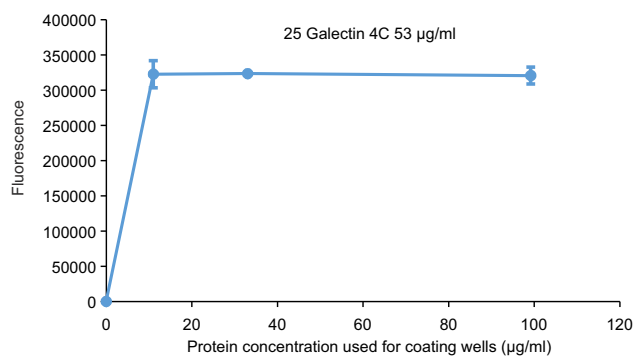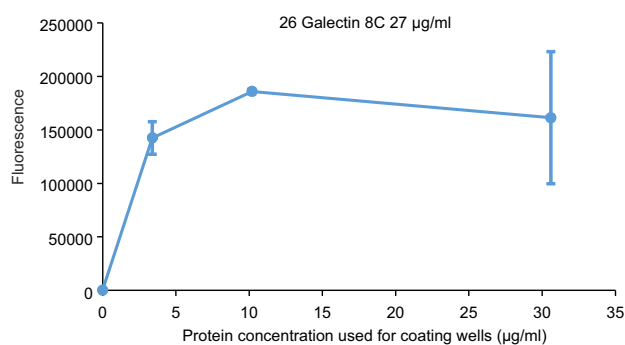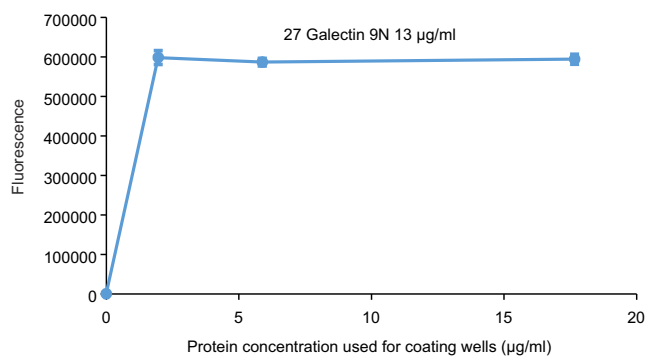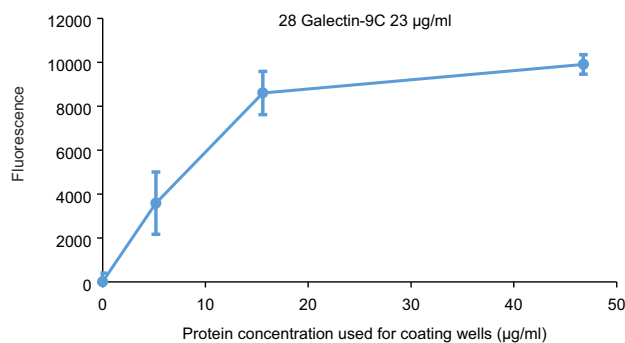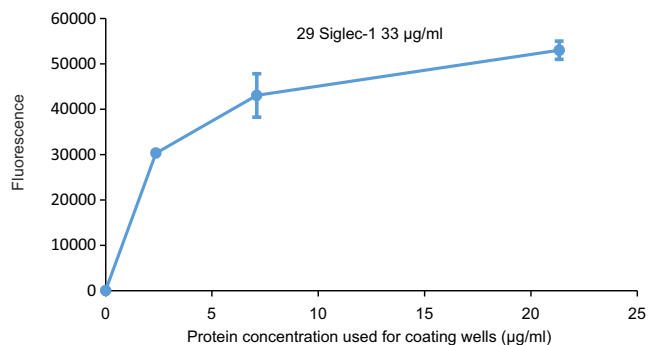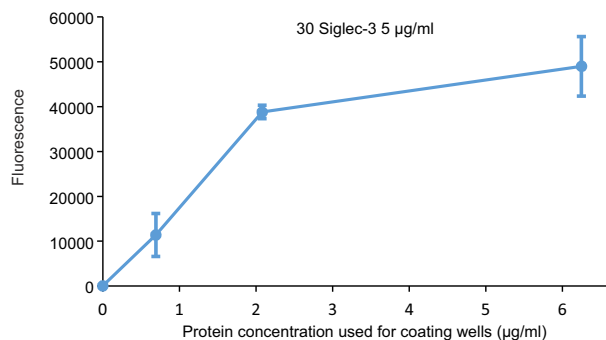

**Figure S34 (Part 3). Saturation curves for coating of assay wells.**

Concentrations of aliquots used to coat individual wells are indicated at the top of each panel.



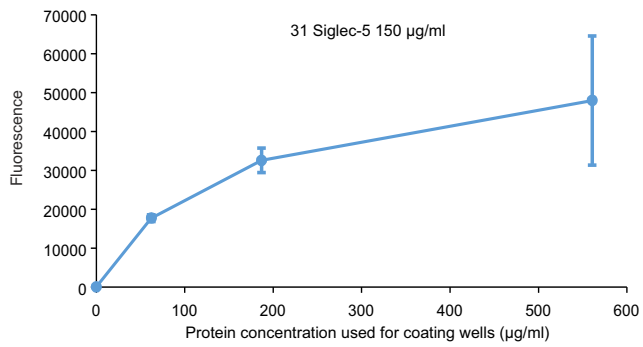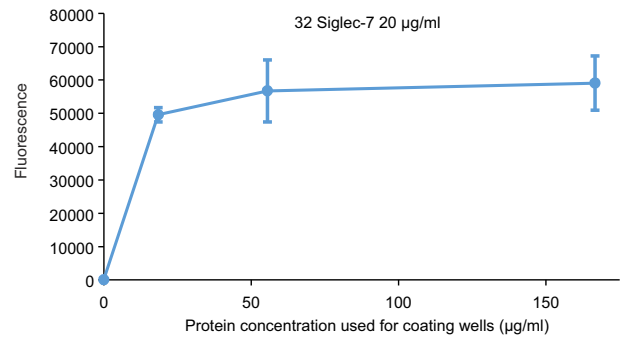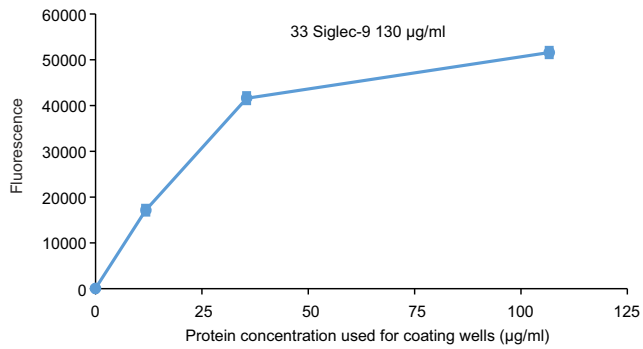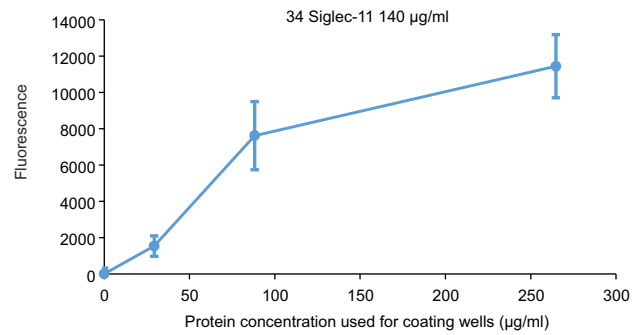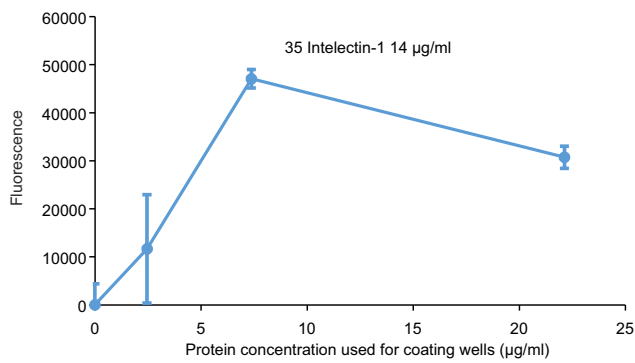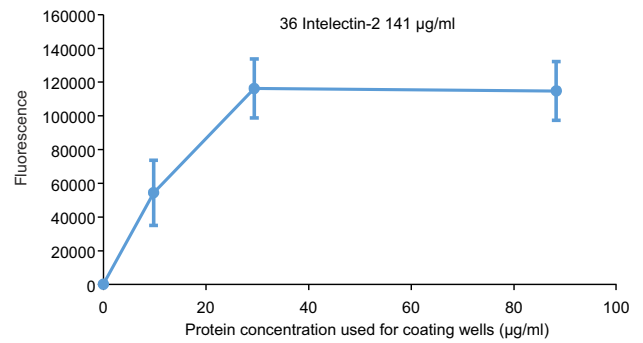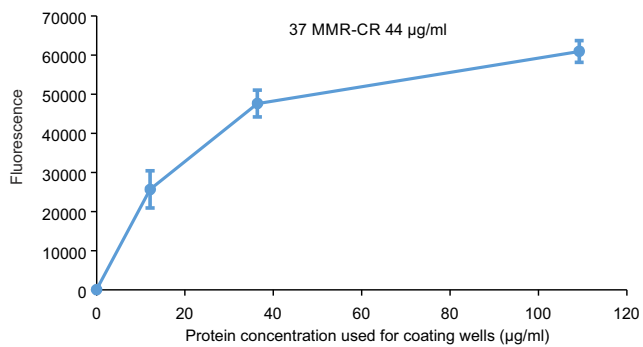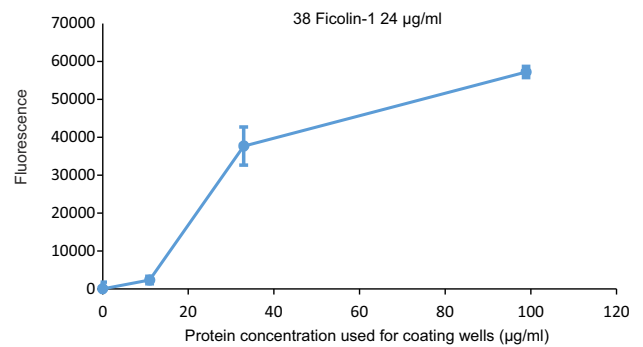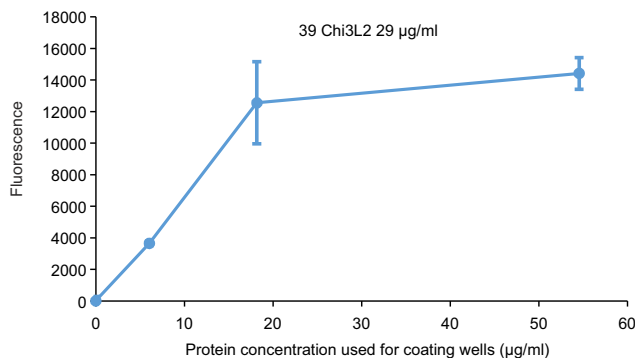

**Figure S34 (Part 4). Saturation curves for coating of assay wells.**  
Concentrations of aliquots used to coat individual wells are indicated at the top of each panel.
